# Supplementary material for: An efficient photo-chemo combination therapeutic platform based on targeted reduction-responsive self-crosslinked polymer nanocapsules
Source: Royal Society of Chemistry journal article supplement (doi:10.1039/d1ma00097g), 2021-01-01
Supplement: d1ma00097g1.pdf [file d1ma00097g1.pdf]

## **Supporting Information**

### **An Efficient Photo-Chemo Combination Therapeutic Platform Based on Targeted Reduction-Responsive Self-Crosslinked Polymer Nanocapsules**

Shengbei Qi<sup>a</sup>, Chaoyong Liu<sup>b</sup>, Meng Qin<sup>b</sup>, Cheng Tao<sup>a</sup>, Jie Liu<sup>a</sup>, Yuan Le<sup>a</sup>, Jiexin Wang<sup>\*,a,b</sup>,  
Jianjun Zhang<sup>\*,a</sup>, Yunfeng Lu<sup>c</sup>

<sup>a</sup> College of Chemical Engineering, Beijing University of Chemical Technology,  
Beijing 100029, China.

<sup>b</sup> Beijing Advanced Innovation Center for Soft Matter Science and Engineering, Beijing  
University of Chemical Technology , Beijing 100029, China.

<sup>c</sup> Department of Chemical and Biomolecular Engineering, University of California at  
Los Angeles , Los Angeles 90095, USA.

E-mail: wangjx@mail.buct.edu.cn. zhangjj@mail.buct.edu.cn.

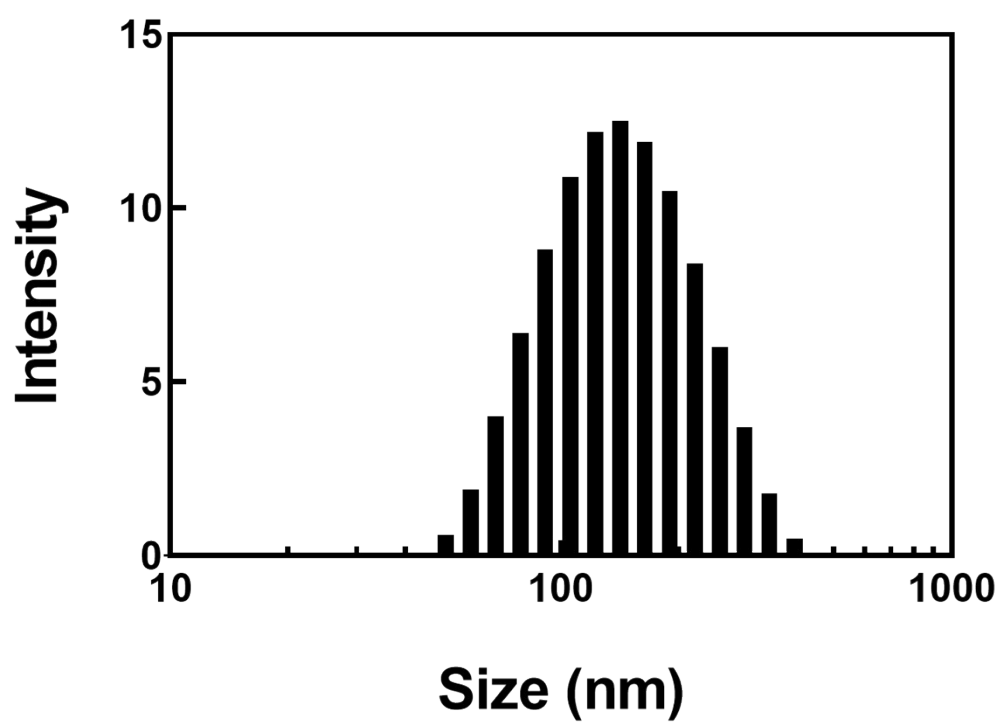

**Figure S1.** The particle size distribution of DINCs dispersed in PBS buffer for 1 week incubation.

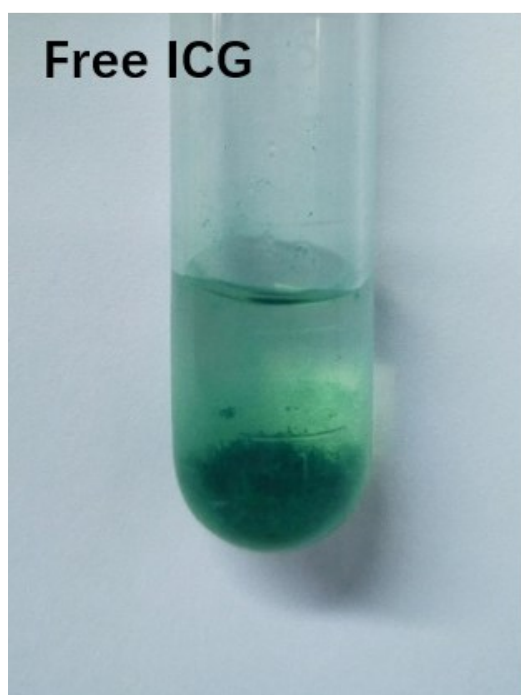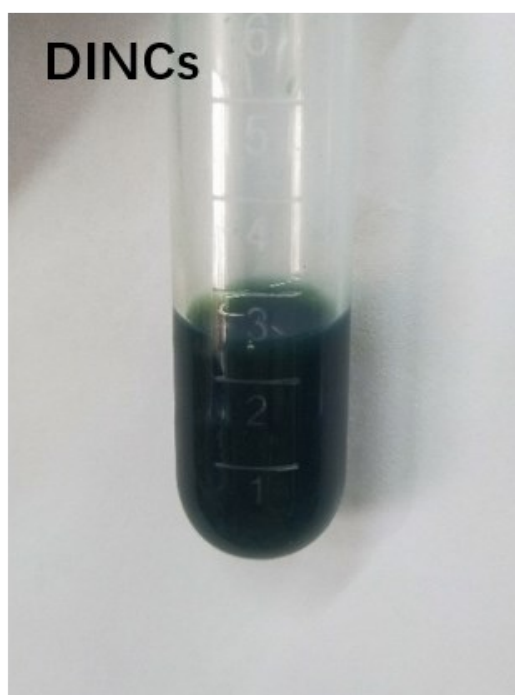

**Figure S2.** Stability of free ICG and DINCs dispersed in PBS after a month.

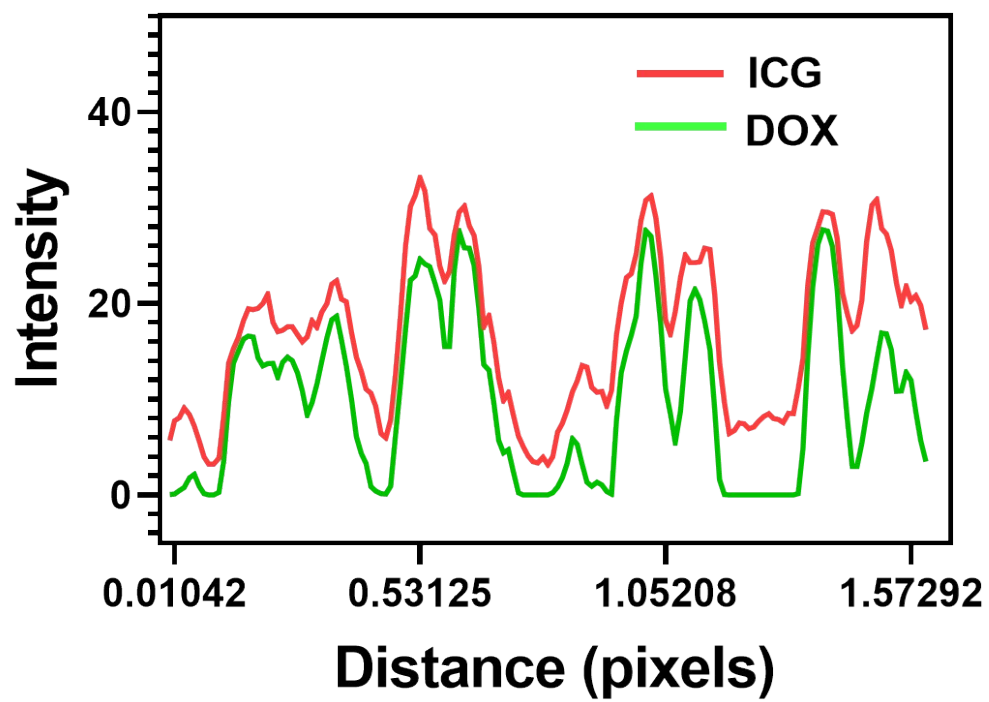

**Figure S3.** The fluorescence colocalization analysis of SCC-15 cells after treatment with DINCs plus laser irradiation by ImageJ.

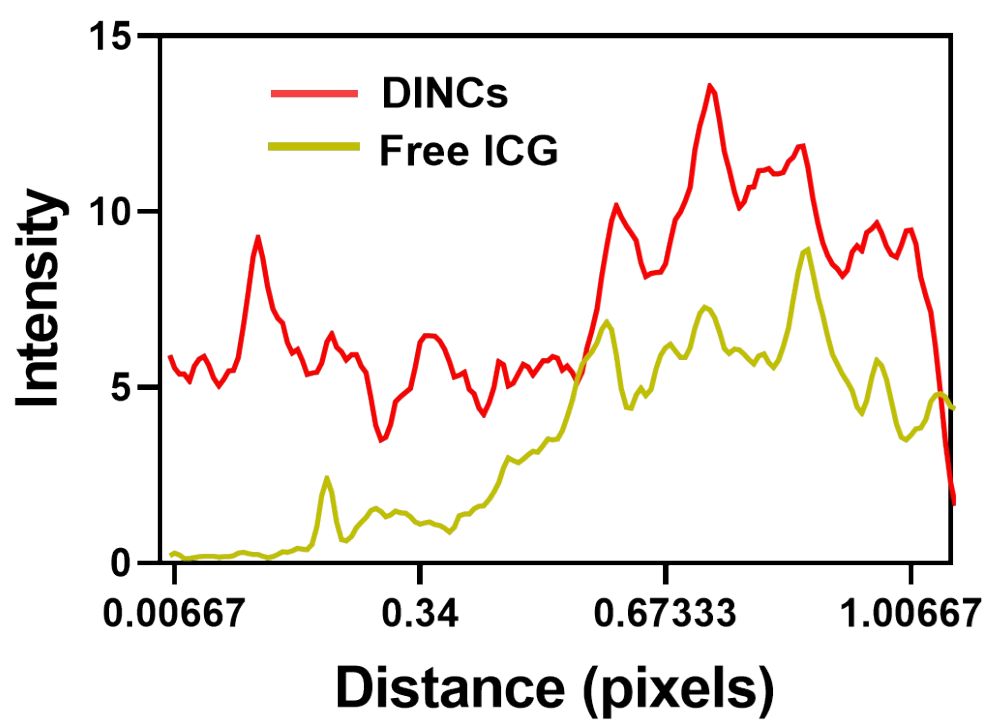

**Figure S4.** Fluorescence intensity analysis of ICG within the tumor section after intravenous injection with free ICG and DINC at 48 h by ImageJ.

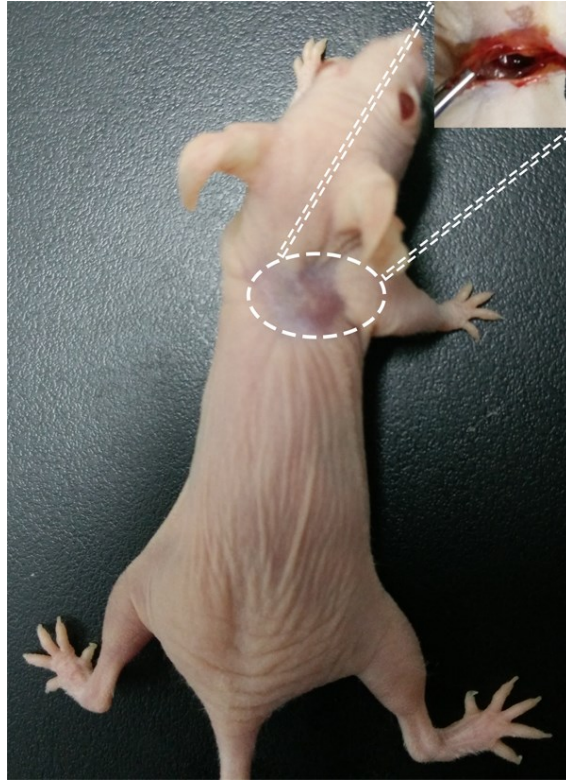

**Figure S5.** Combined treatment of DINC<sub>s</sub> yielded higher synergistic therapy effect and no tumor recurrence was noted over a course of 21 days.

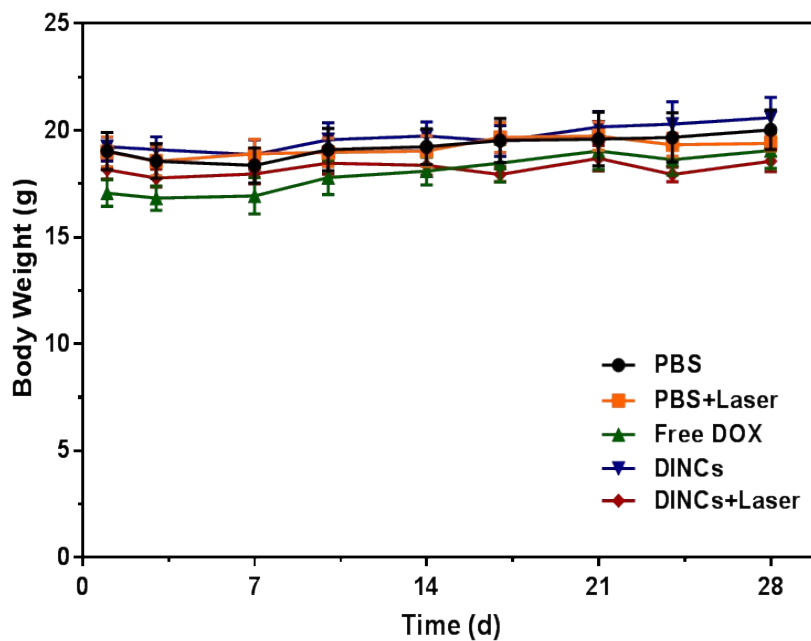

**Figure S6.** Body weight curves of the mice after treating with PBS, PBS plus laser (785 nm, 2.0 W cm<sup>-2</sup>, 5 min), free DOX, DINC s, and DINC s plus laser (785 nm, 2.0 W cm<sup>-2</sup>, 5 min) at 28 d postadministration.

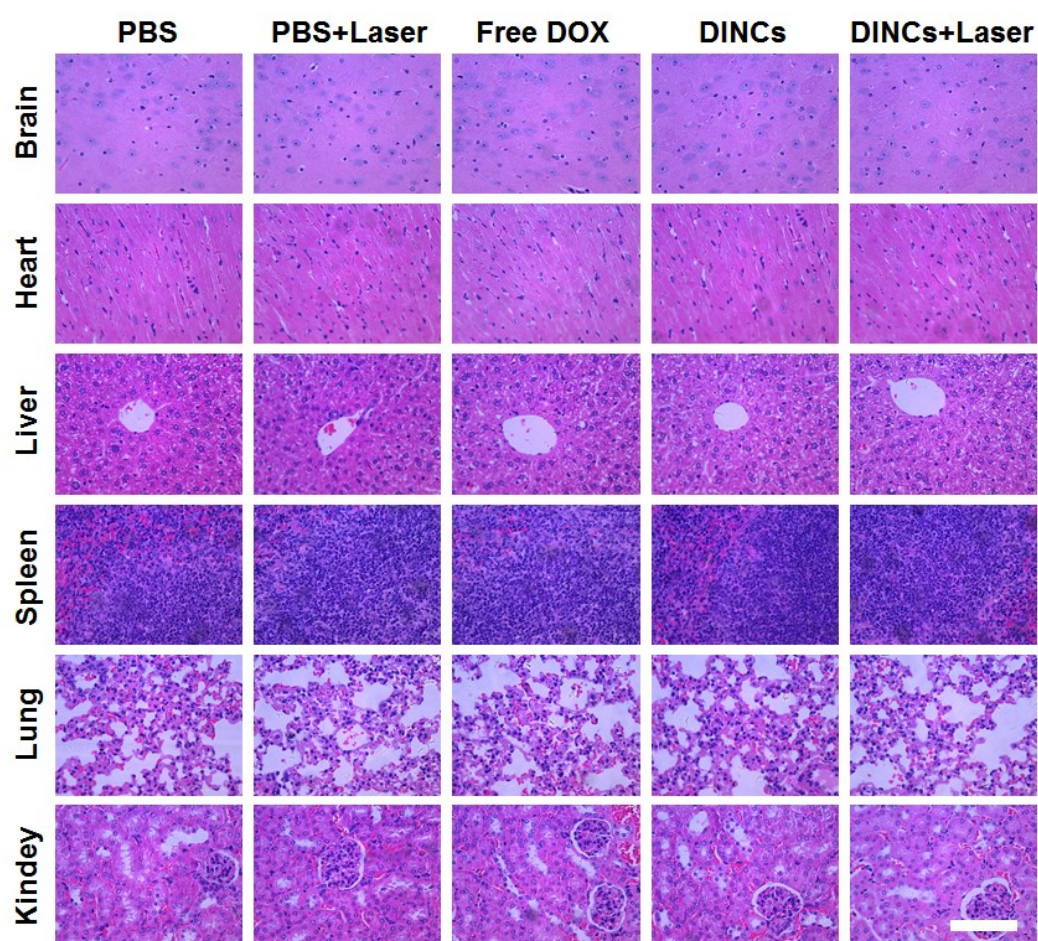

**Figure S7.** Histological examination for mice treated with PBS, PBS plus laser (785 nm, 2.0 W cm<sup>-2</sup>, 5 min), free DOX, DINCs, and DINCs plus laser (785 nm, 2.0 W cm<sup>-2</sup>, 5 min) at 28 d postadministration. Scale bar: 50 μm.
